# Supplementary material for: Childbirth outcomes and ethnic disparities in Suriname: a nationwide registry-based study in a middle-income country
Source: PubMed Central journal article supplement (PMC7206667; doi:10.1186/s12978-020-0902-7), 2020-05-07

**Supplementary File 1** Visual summary of data availability per hospital (I-V)

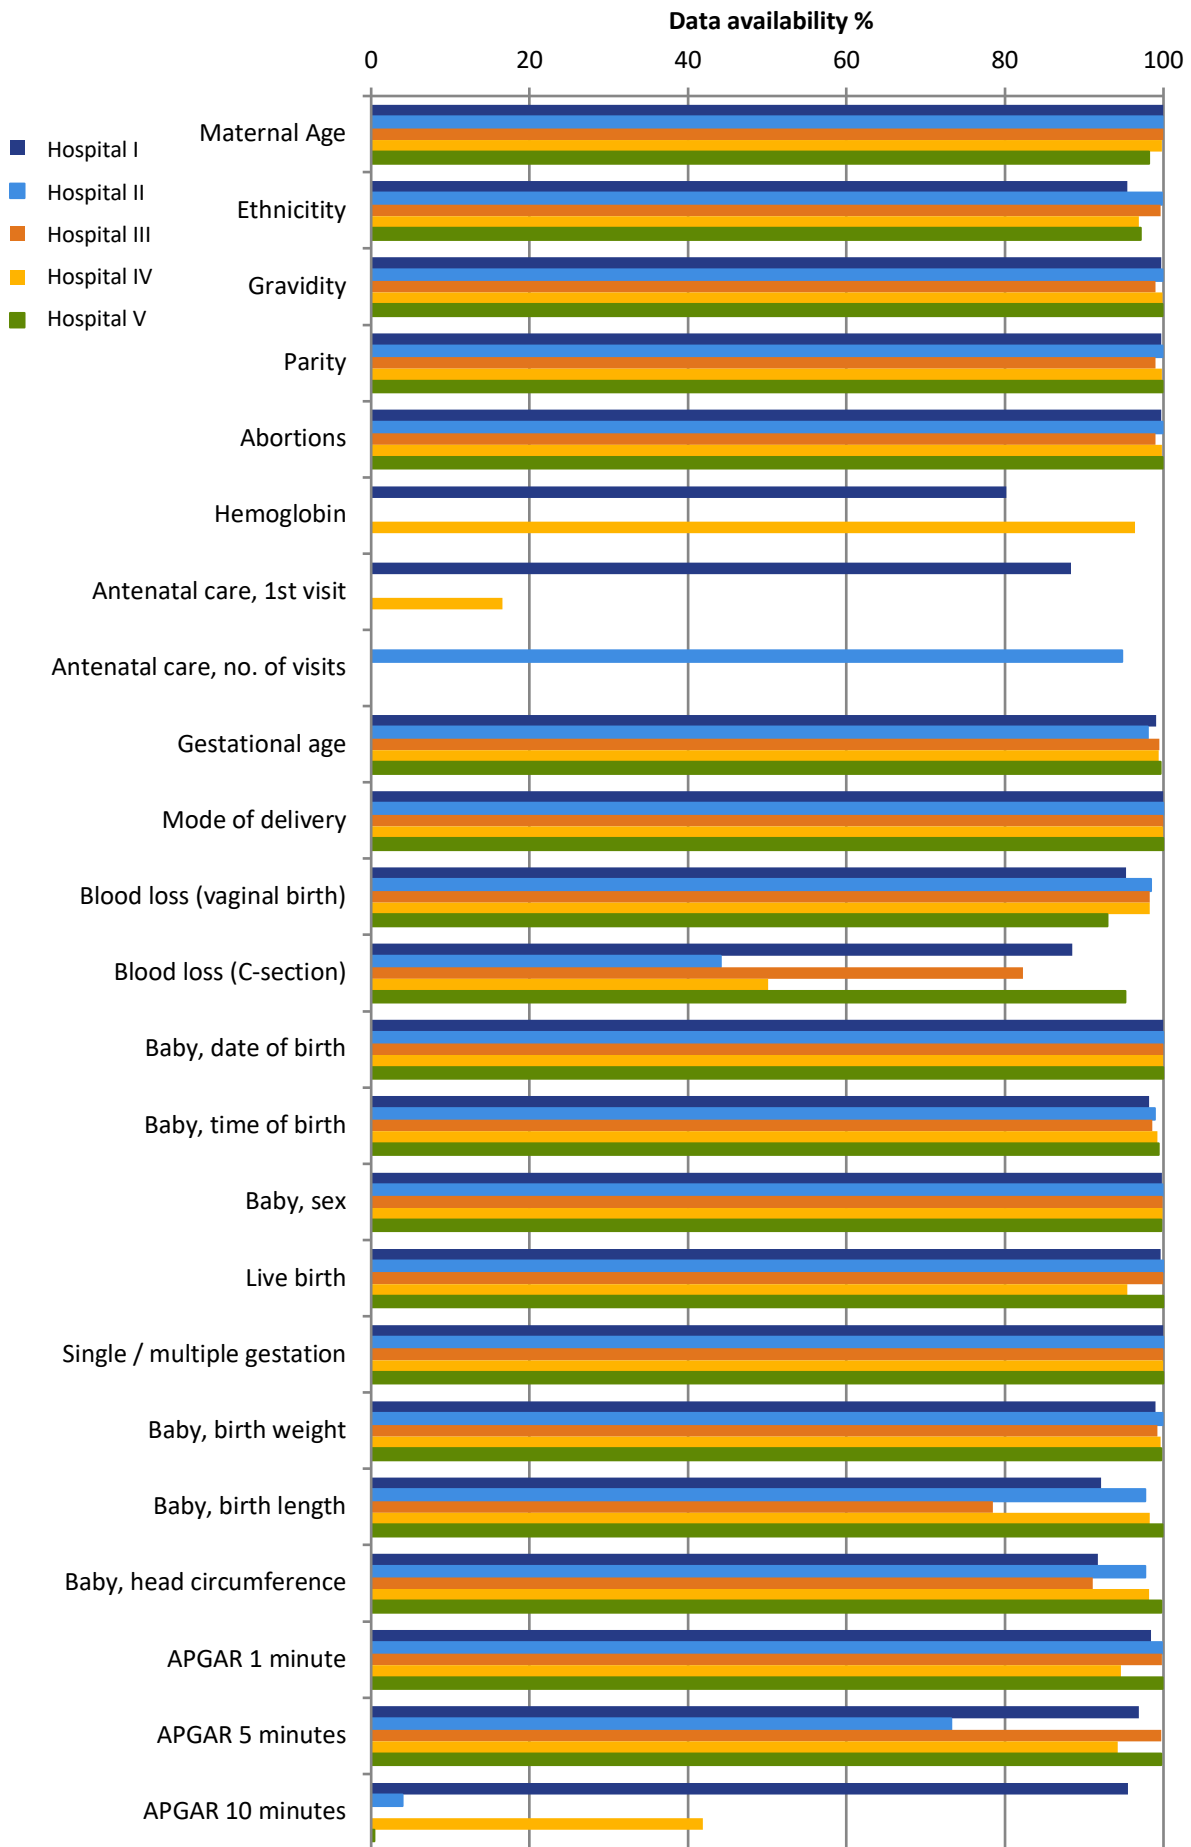

Supplement: 12978_2020_902_MOESM1_ESM.pdf [file 12978_2020_902_MOESM1_ESM.pdf]
