# Supplementary material for: Childbirth outcomes and ethnic disparities in Suriname: a nationwide registry-based study in a middle-income country
Source: PubMed Central journal article supplement (PMC7206667; doi:10.1186/s12978-020-0902-7), 2020-05-07
Supplement: 12978_2020_902_MOESM2_ESM.pdf [file 12978_2020_902_MOESM2_ESM.pdf]

**Supplementary file 2** Differences in maternal and neonatal characteristics between hospitals in Suriname (2016-2017)

|                                            | Hospital     |               |                |               |              | p value |
|--------------------------------------------|--------------|---------------|----------------|---------------|--------------|---------|
|                                            | I<br>n = (%) | II<br>n = (%) | III<br>n = (%) | IV<br>n = (%) | V<br>n = (%) |         |
| <b>Deliveries</b>                          | 4380 (23.9)  | 5070 (27.7)   | 5089 (27.8)    | 3034 (16.6)   | 717 (3.9)    | <0.05   |
| 2016                                       | 2272 (24.7)  | 2418 (26.3)   | 2633 (28.6)    | 1531 (16.6)   | 348 (3.8)    |         |
| 2017                                       | 2108 (23.2)  | 2652 (29.2)   | 2456 (27.0)    | 1503 (16.5)   | 369 (4.1)    |         |
| <b>Teenage pregnancy</b>                   |              |               |                |               |              |         |
| < 20 years                                 | 782 (17.9)   | 567 (11.2)    | 835 (16.4)     | 222 (7.3)     | 112 (15.9)   |         |
| 20 – 35 years                              | 3165 (72.6)  | 3762 (74.2)   | 3728 (73.3)    | 2446 (80.7)   | 545 (77.4)   |         |
| ≥ 36 years                                 | 414 (9.5)    | 741 (14.6)    | 522 (10.3)     | 363 (12.0)    | 47 (6.7)     | <0.05   |
| <b>Ethnicity</b>                           |              |               |                |               |              |         |
| Maroon                                     | 1758 (41.9)  | 1254 (24.8)   | 1746 (34.4)    | 189 (6.5)     | 3 (0.4)      |         |
| Creole                                     | 1138 (27.1)  | 1342 (26.6)   | 1078 (21.2)    | 614 (20.9)    | 45 (6.5)     |         |
| Hindustani                                 | 700 (16.7)   | 940 (18.5)    | 808 (15.9)     | 554 (18.3)    | 393 (54.8)   |         |
| Mixed                                      | 168 (4.0)    | 654 (12.9)    | 735 (14.5)     | 579 (19.7)    | 117 (16.8)   |         |
| Javanese                                   | 251 (6.0)    | 605 (12.0)    | 422 (8.3)      | 594 (20.2)    | 76 (10.9)    |         |
| Inheems                                    | 166 (4.0)    | 170 (3.4)     | 247 (4.9)      | 54 (1.8)      | 45 (6.5)     | < 0.05  |
| Chinees                                    | 14 (0.3)     | 62 (1.2)      | 29 (0.6)       | 260 (8.8)     | 16 (2.3)     |         |
| Other                                      | 1 (0.0)      | 25 (0.5)      | 14 (0.3)       | 96 (3.3)      | 1 (0.1)      |         |
| <b>Parity</b>                              |              |               |                |               |              |         |
| 0                                          | 1226 (28.1)  | 1942 (38.7)   | 1502 (29.5)    | 1295 (42.7)   | 278 (38.8)   |         |
| 1 - 3                                      | 2333 (53.4)  | 2470 (49.2)   | 2770 (54.5)    | 1598 (52.7)   | 382 (53.4)   | <0.05   |
| ≥ 4                                        | 810 (18.5)   | 609 (12.1)    | 815 (16.0)     | 138 (4.6)     | 56 (7.8)     |         |
| <b>Anaemia</b>                             |              |               |                |               |              |         |
| Moderate                                   | 1612 (45.9)  | N/A           | N/A            | 728 (31.1)    | N/A          | <0.05   |
| Severe                                     | 138 (3.9)    | N/A           | N/A            | 15 (0.5)      | N/A          |         |
| <b>Mode of delivery</b>                    |              |               |                |               |              | <0.05   |
| Spontaneous                                | 3595 (82.1)  | 3835 (75.6)   | 3733 (73.4)    | 1933 (63.7)   | 554 (77.3)   |         |
| Vacuum                                     | 12 (0.3)     | 135 (2.7)     | 44 (0.9)       | 2 (0.1)       | 38 (5.3)     |         |
| Cesarean                                   | 773 (17.6)   | 1100 (21.7)   | 1312 (25.8)    | 1099 (36.2)   | 125 (17.4)   | <0.05   |
| <b>Post partum hemorrhage</b>              |              |               |                |               |              |         |
| 500 - 999 mL                               | 204 (4.9)    | 253 (5.3)     | 412 (9.6)      | 108 (4.4)     | 54 (8.1)     |         |
| ≥ 1000 mL                                  | 59 (1.4)     | 67 (1.4)      | 90 (2.1)       | 24 (1.0)      | 16 (2.4)     | <0.05   |
| <b>Gestational age</b>                     |              |               |                |               |              |         |
| < 28 weeks                                 | 113 (2.6)    | 44 (0.9)      | 39 (0.8)       | 15 (0.5)      | 6 (0.8)      |         |
| 32 – 36 weeks                              | 669 (15.4)   | 515 (10.2)    | 729 (14.6)     | 327 (10.8)    | 72 (10.1)    | <0.05   |
| ≥ 37 weeks                                 | 3558 (82.0)  | 4484 (88.9)   | 4218 (84.6)    | 2673 (88.7)   | 636 (89.1)   |         |
| <b>Total babies born</b>                   | 4444         | 5138          | 5147           | 3058          | 717          |         |
| Live Births                                | 4281 (96.3)  | 5048 (98.2)   | 5052 (98.2)    | 3031 (99.1)   | 705 (98.3)   |         |
| Stillbirths <sup>≥22 weeks or 1000 g</sup> | 163 (3.7)    | 90 (1.8)      | 94 (1.8)       | 27 (0.9)      | 12 (1.7)     | <0.05   |
| <b>Birth weight</b>                        |              |               |                |               |              |         |
| < 2500 grams                               | 917 (20.8)   | 625 (12.3)    | 789 (15.3)     | 344 (11.3)    | 99 (13.8)    |         |
| 2500 – 4000 grams                          | 3373 (76.7)  | 4296 (84.3)   | 4234 (82.3)    | 2580 (84.7)   | 586 (82.0)   | <0.05   |
| ≥ 4000 grams                               | 109 (2.5)    | 176 (3.5)     | 120 (2.3)      | 123 (4.0)     | 30 (4.2)     |         |
| <b>APGAR score 5 minutes</b>               |              |               |                |               |              |         |
| Below 7                                    | 273 (6.3)    | 164 (3.2)     | 133 (3.5)      | 48 (1.7)      | 30 (4.2)     | <0.05   |
| <b>Stillbirths <sup>≥ 28 weeks</sup></b>   |              |               |                |               |              |         |
| n=                                         | 109          | 69            | 74             | 22            | 11           |         |
| SBR per 1000 births <sup>1</sup>           | 25.6         | 13.7          | 14.7           | 7.3           | 15.5         | <0.05   |
| <b>Maternal deaths</b>                     |              |               |                |               |              |         |
| n=                                         | 8            | 3             | 4              | 5             | -            |         |
| MMR per 100.000 live births <sup>2,3</sup> | 186.9        | 59.4          | 79.1           | 165.0         | -            | <0.05   |

<sup>1</sup> SBR: stillbirth rate = per 1000 births <sup>≥ 28 weeks or ≥ 1000 grams</sup>

<sup>2</sup> MMR: maternal mortality rate, maternal deaths per 100.000 live births (LB), hospital is location of death, n=5 occurred at home or in primary health care services.

<sup>3</sup> Maternal deaths: one death in hospital I was a delivery from hospital II and one was a home delivery, one death in hospital II died during transport to the hospital, one death in hospital IV was a woman who gave childbirth in hospital I.
